# Supplementary material for: Neutrophils Expressing Programmed Death-Ligand 1 Play an Indispensable Role in Effective Bacterial Elimination and Resolving Inflammation in Methicillin-Resistant Staphylococcus aureus Infection
Source: MDPI journal article supplement (doi:10.3390/pathogens13050401), 2024-05-11
Supplement: s1 [file s1]

## Supplemental Material

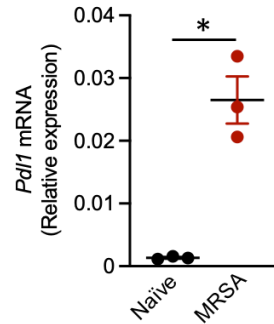

**Supplemental Figure S1.** PD-L1 mRNA expression in peripheral blood neutrophils. Peripheral blood neutrophils were isolated from naïve or MRSA infected mice (48 h), then total RNA isolated from the cells were subjected to real-time PCR for quantification of PD-L1 mRNA expression. The cumulative data were shown as mean  $\pm$  standard error (SD) of three samples. Student t-test was used to analyze data for significant difference. Values of  $*p < 0.001$  was regarded as significant.

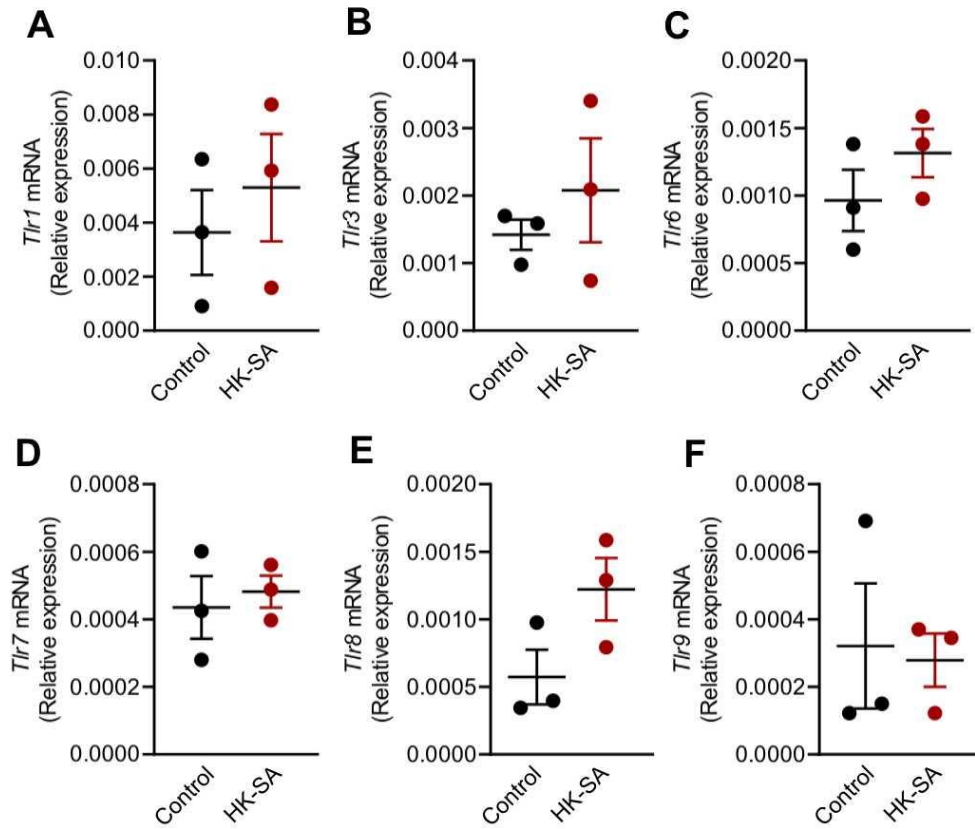

**Supplemental Figure S2.** Gene expression of TLR in neutrophils. Neutrophils were cultured with control or HK-SA (MOI=1:10) at 37°C for 3 h, then isolated total RNA was subjected to real-time PCR. The mRNA expression of TLR1 (A), TLR3 (B), TLR6 (C), TLR7 (D), TLR8 (E) and TLR9 (F) are shown. The cumulative data were shown as mean  $\pm$  standard error (SD) of three samples. Student t-test was used to analyze data for significant differences.

**Supplemental Table S1.** Primer sequences for real-time PCR

---

*Pdl1*-forward: 5'- GCTCCAAAGGACTTGTACGTG-3'

*Pdl1*-reverse: 5'-TGATCTGAAGGGCAGCATTTTC-3'

*Tlr1*-forward: 5'-TGAGGGTCCTGATAATGTCCTAC-3'

*Tlr1*-reverse: 5'-AGAGGTCCAAATGCTTGAGGC-3' *Tlr2*-

forward: 5'-GCAAACGCTGTTCTGCTCAG-3'

*Tlr2*-reverse: 5'-AGGCGTCTCCCTCTATTGTATT-3' *Tlr3*-

forward: 5'-GTGAGATACAACGTAGCTGACTG-3' *Tlr3*-

reverse: 5'-TCCTGCATCCAAGATAGCAAGT-3' *Tlr4*-

forward: 5'-AGGCACATGCTCTAGCACTAA-3' *Tlr4*-

reverse: 5'-AGGCTCCCCAGTTTAACTCTG-3'

*Tlr6*-forward: 5'-TGAGCCAAGACAGAAAACCCA-3'

*Tlr6*-reverse: 5'-GGGACATGAGTAAGGTTCCCTGTT-3'

*Tlr7*-forward: 5'-ATGTGGACACGGAAGAGACAA-3'

*Tlr7*-reverse: 5'-GGTAAGGGTAAGATTGGTGGTG-3'

*Tlr8*-forward: 5'-GAAAACATGCCCCCTCAGTCA-3'

*Tlr8*-reverse: 5'-CGTCACAAGGATAGCTTCTGGAA-3'

*Tlr9*-forward: 5'-ATGGTTCTCCGTCGAAGGACT-3'

*Tlr9*-reverse: 5'-GAGGCTTCAGCTCACAGGG-3'

*Gapdh*-forward: 5'-TGTGTCCGTCGTGGATCTGA-3'

*Gapdh*-reverse: 5'-TTGCTGTTGAAGTCGCAGGAG-3'

---
